# Supplementary material
Source: MDPI journal article supplement (https://www.mdpi.com/1424-2818/13/6/230)
Supplement: s1 [file s1]

Table S1. Numbers of ARG drug classes detected in six samples.

| Drug class               | SZ1 | SZ2 | SZ3 | WH1 | WH2 | WH3 |
|--------------------------|-----|-----|-----|-----|-----|-----|
| Aminocoumarin            | 1   | 0   | 1   | 0   | 0   | 0   |
| Aminoglycoside           | 32  | 34  | 16  | 31  | 30  | 32  |
| Carbapenem               | 5   | 13  | 5   | 10  | 9   | 5   |
| Cephalosporin            | 13  | 13  | 0   | 22  | 19  | 17  |
| Cephameycin              | 1   | 1   | 7   | 3   | 2   | 2   |
| Diaminopyrimidine        | 2   | 4   | 2   | 7   | 5   | 6   |
| Fluoroquinolone          | 9   | 14  | 10  | 12  | 9   | 5   |
| Fosfomycin               | 1   | 1   | 0   | 2   | 2   | 1   |
| Fusidic acid             | 1   | 1   | 0   | 0   | 0   | 0   |
| Glycopeptide             | 4   | 5   | 4   | 12  | 12  | 10  |
| Glycylcycline            | 3   | 3   | 3   | 5   | 5   | 2   |
| Lincosamide              | 8   | 7   | 6   | 8   | 10  | 8   |
| Macrolide                | 36  | 46  | 23  | 39  | 36  | 35  |
| Monobactam               | 7   | 6   | 2   | 8   | 5   | 3   |
| Mupirocin                | 1   | 1   | 1   | 2   | 2   | 1   |
| Nitroimidazole           | 1   | 1   | 1   | 0   | 1   | 1   |
| Nucleoside               | 2   | 2   | 0   | 5   | 4   | 1   |
| Oxazolidinone            | 0   | 0   | 0   | 1   | 1   | 1   |
| Para-aminosalicylic acid | 1   | 1   | 0   | 0   | 0   | 0   |
| Penam                    | 4   | 4   | 3   | 7   | 4   | 4   |
| Peptide                  | 8   | 9   | 3   | 11  | 6   | 7   |
| Phenicol                 | 9   | 8   | 3   | 10  | 10  | 8   |
| Pleuromutilin            | 1   | 1   | 1   | 0   | 0   | 0   |
| Rifamycin                | 2   | 3   | 3   | 1   | 2   | 3   |
| Streptogramin            | 4   | 3   | 0   | 1   | 1   | 1   |
| Sulfonamide              | 3   | 3   | 3   | 3   | 3   | 3   |
| Tetracycline             | 16  | 15  | 6   | 15  | 16  | 14  |
| Triclosan                | 1   | 3   | 1   | 1   | 1   | 0   |

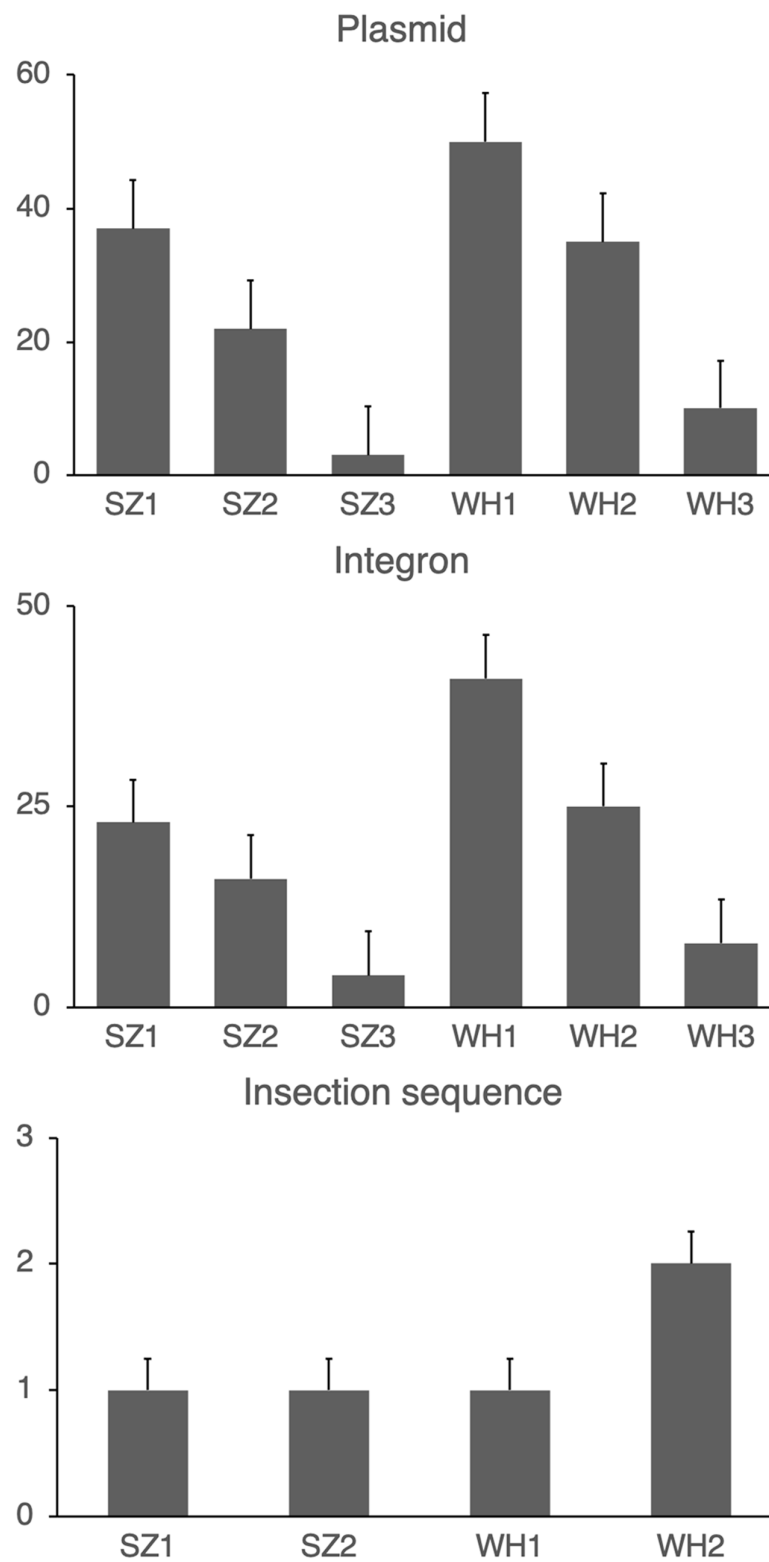

Figure S1. The numbers of MGEs in six samples.

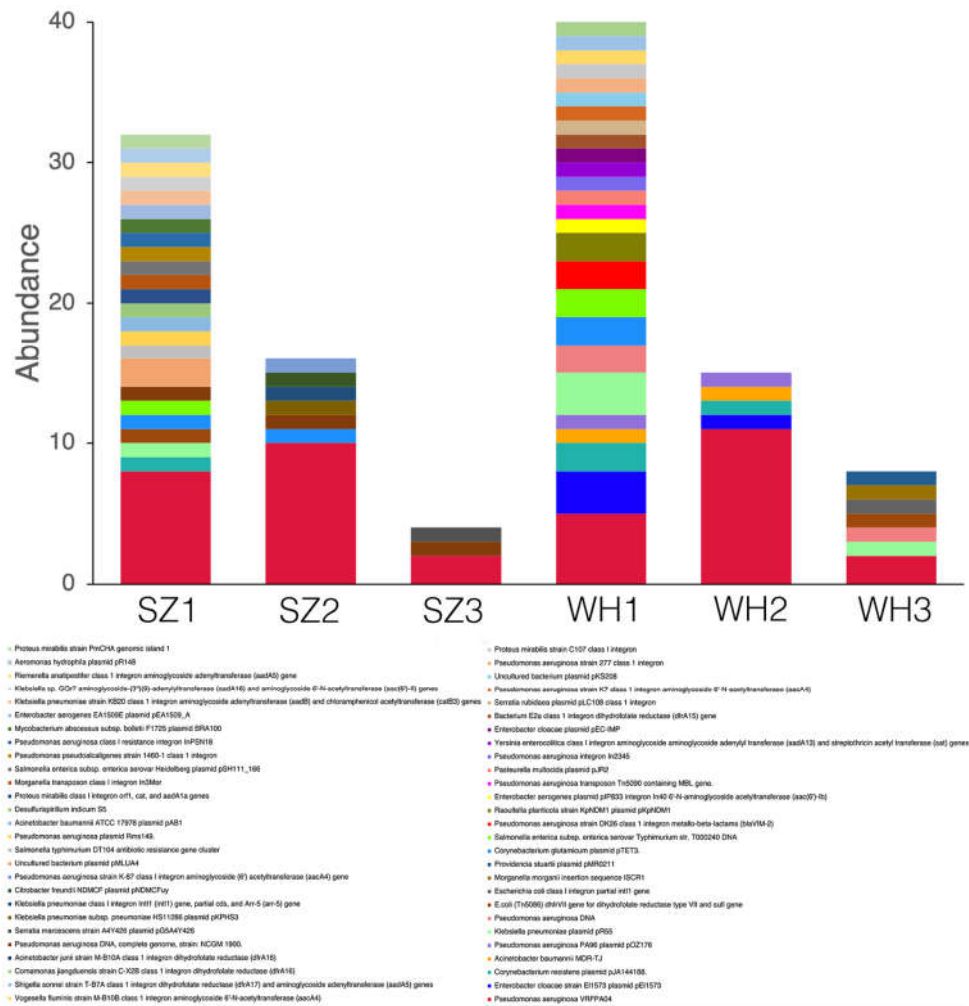

Figure S2. The abundance of integrons in six samples.

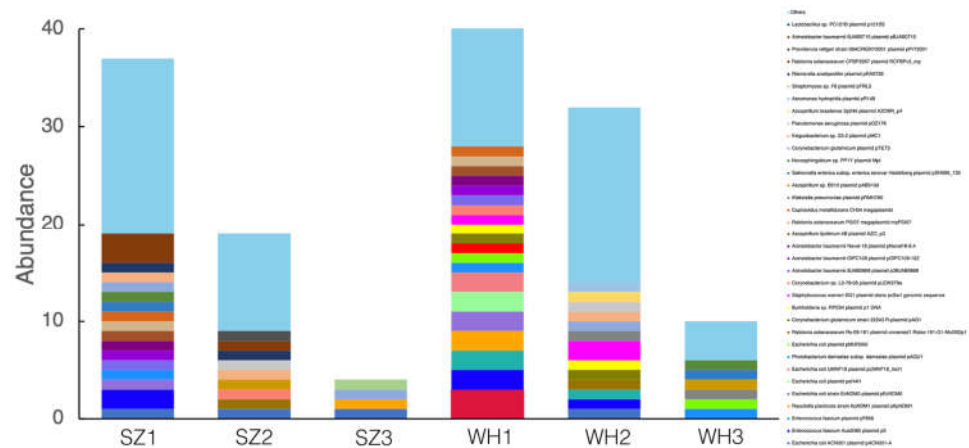

Figure S3. The abundance of plasmids in six samples.
